# Supplementary material for: The Unusual Aggregation and Fusion Activity of the Antimicrobial Peptide W-BP100 in Anionic Vesicles
Source: MDPI journal article supplement (doi:10.3390/membranes13020138), 2023-01-21
Supplement: s1 [file s1]

## SUPPLEMENTARY MATERIAL

# The unusual aggregation and fusion activity of the antimicrobial peptide W-BP100 in anionic vesicles

Ana Rita Ferreira <sup>1</sup>, Mariana Ferreira <sup>1,\*</sup>, Cláudia Nunes <sup>2</sup>, Salette Reis <sup>2</sup>, Cátia Teixeira <sup>1,†</sup>, Paula Gomes <sup>1</sup> and Paula Gameiro <sup>1</sup>

<sup>1</sup> LAQV/REQUIMTE (Laboratório Associado para a Química Verde—Rede de Química e Tecnologia), Departamento de Química e Bioquímica, Faculdade de Ciências, Universidade do Porto, Rua do Campo Alegre, s/n, 4169-007 Porto, Portugal; ritaferreira@fc.up.pt (A.R.F.); pgomes@fc.up.pt (P.G.); agsantos@fc.up.pt (P.G.).

<sup>2</sup> LAQV/REQUIMTE, Laboratório de Química Aplicada, Faculdade de Farmácia da Universidade do Porto, Portugal, Rua de Jorge Viterbo Ferreira, 228, 4050-313 Porto, Portugal; cdnunes@ff.up.pt (C.N.); shreis@ff.up.pt (S.R.).

† Current affiliation: Gyros Protein Technologies, Tucson, AZ 85714, United States of America. ca.teixeira@gmail.com (C.T.).

\* Correspondence: mariana.ferreira@fc.up.pt (M.F.).

### Contents of Supplementary material

**Supplementary Figure S1.** Intensity-weighted size distribution of POPC:POPG (1:1) LUVs in the presence of W-BP100 obtained by DLS.

**Supplementary Figure S2.** Intensity-weighted size distribution of POPC:POPG (3:1) LUVs in the presence of W-BP100 obtained by DLS.

**Supplementary Figure S3.** Intensity-weighted size distribution of POPE:POPG (1:1) LUVs in the presence of W-BP100 obtained by DLS.

**Supplementary Figure S4.** Confocal microscopy imaging of POPC:POPG (1:1) GUVs incubated with W-BP100 (P/L = 1.2).

**Supplementary Figure S5.** Confocal microscopy imaging of POPC:POPG (1:1) GUVs incubated with HEPES buffer.

**Supplementary Video S1.** Confocal microscopy imaging of POPC:POPG (1:1) GUVs incubated with W-BP100 (P/L = 0.8).

**Supplementary Video S2.** Confocal microscopy imaging of POPC:POPG (1:1) GUVs incubated with W-BP100 (P/L = 1.7).

**Supplementary Video S3.** Confocal microscopy imaging of POPC:POPG (1:1) GUVs incubated with W-BP100 (P/L = 2.5).

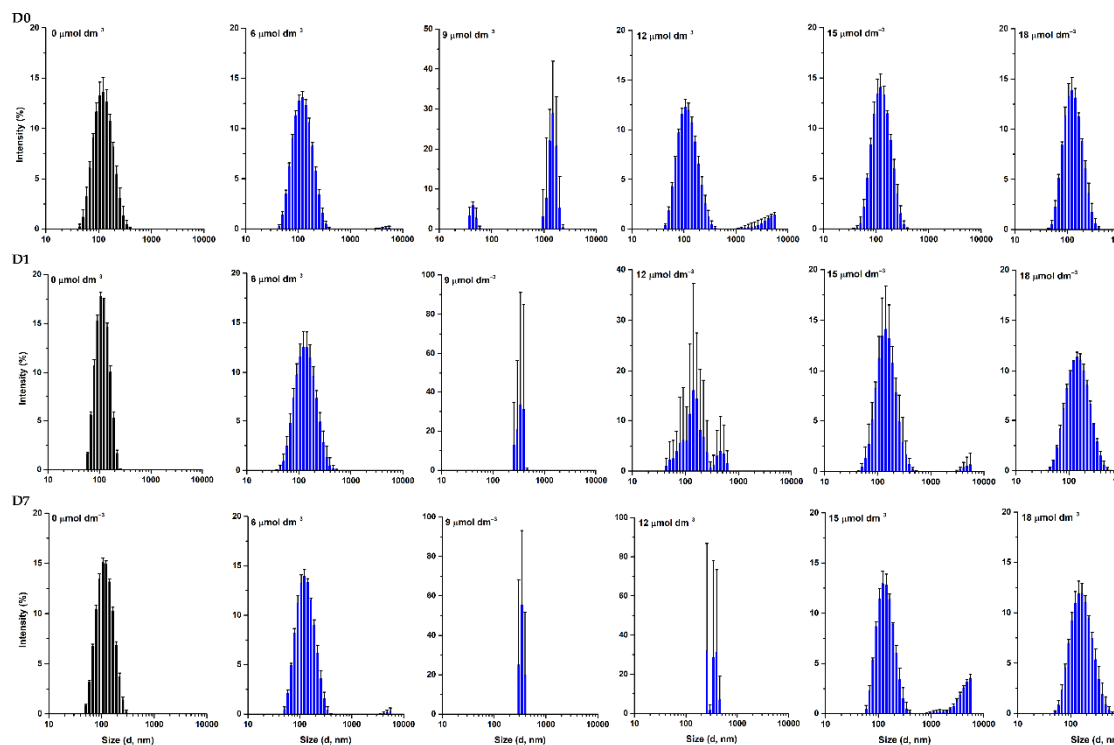

**Figure S1.** Intensity-weighted size distribution of POPC:POPG (1:1) LUVs in the presence of W-BP100 obtained by DLS. Intensity-weighted size distribution of  $100 \mu\text{mol dm}^{-3}$  POPC:POPG (1:1) LUVs in the absence (black) and presence (blue) of increasing W-BP100 concentrations, at day 0 (10 min upon peptide incubation), 1 and 7 upon peptide incubation, at  $25.0 \pm 0.1^\circ\text{C}$ .  $d$  stands for vesicle diameter. Data are the mean  $\pm$  SD of three replicate measurements (one single experiment).

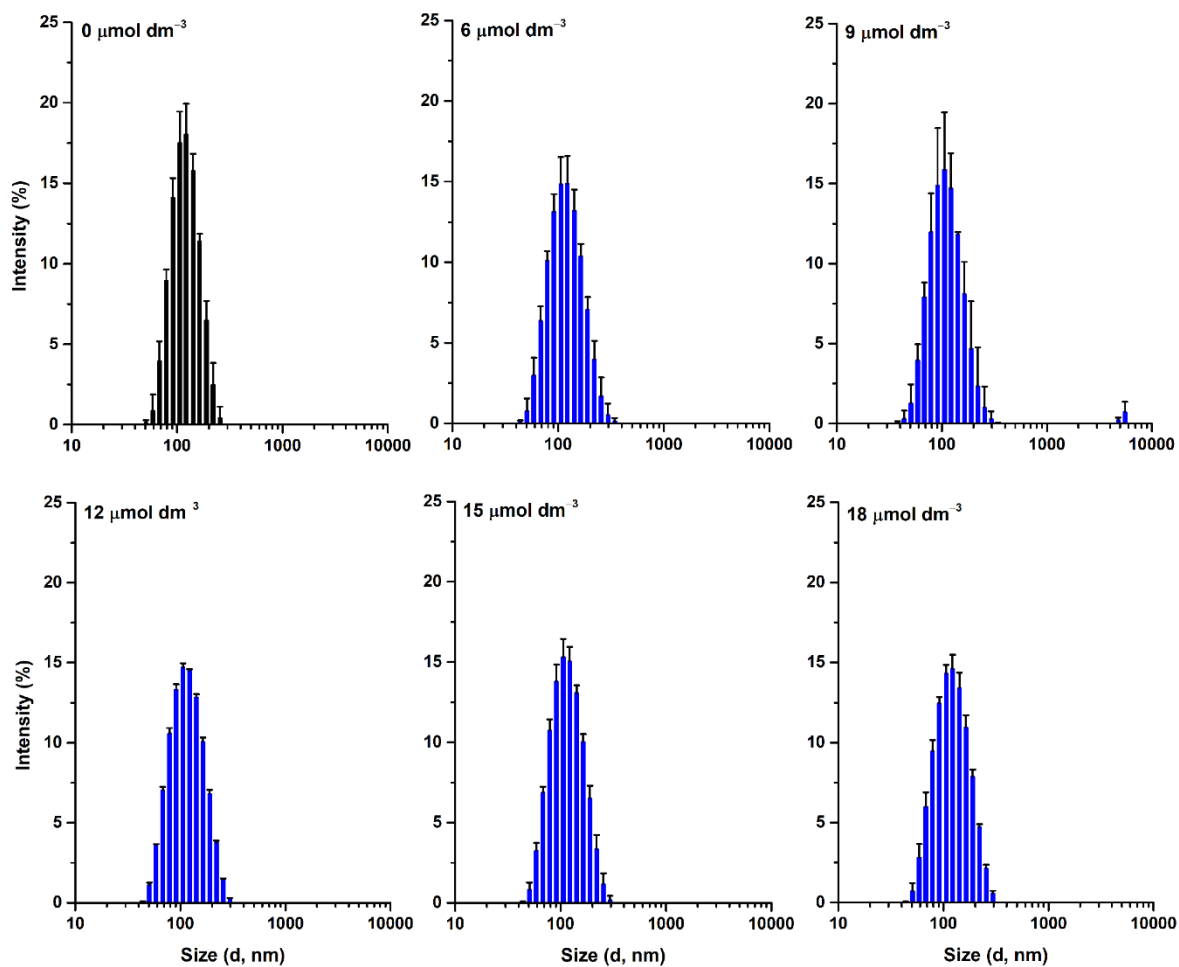

**Figure S2.** Intensity-weighted size distribution of POPC:POPG (3:1) LUVs in the presence of W-BP100 obtained by DLS. Intensity-weighted size distribution of  $100 \mu\text{mol dm}^{-3}$  POPC:POPG (3:1) LUVs in the absence (black) and presence (blue) of increasing W-BP100 concentrations, at  $25.0 \pm 0.1^\circ\text{C}$ .  $d$  stands for vesicle diameter. Data are the mean  $\pm$  SD of three replicate measurements (one single experiment).

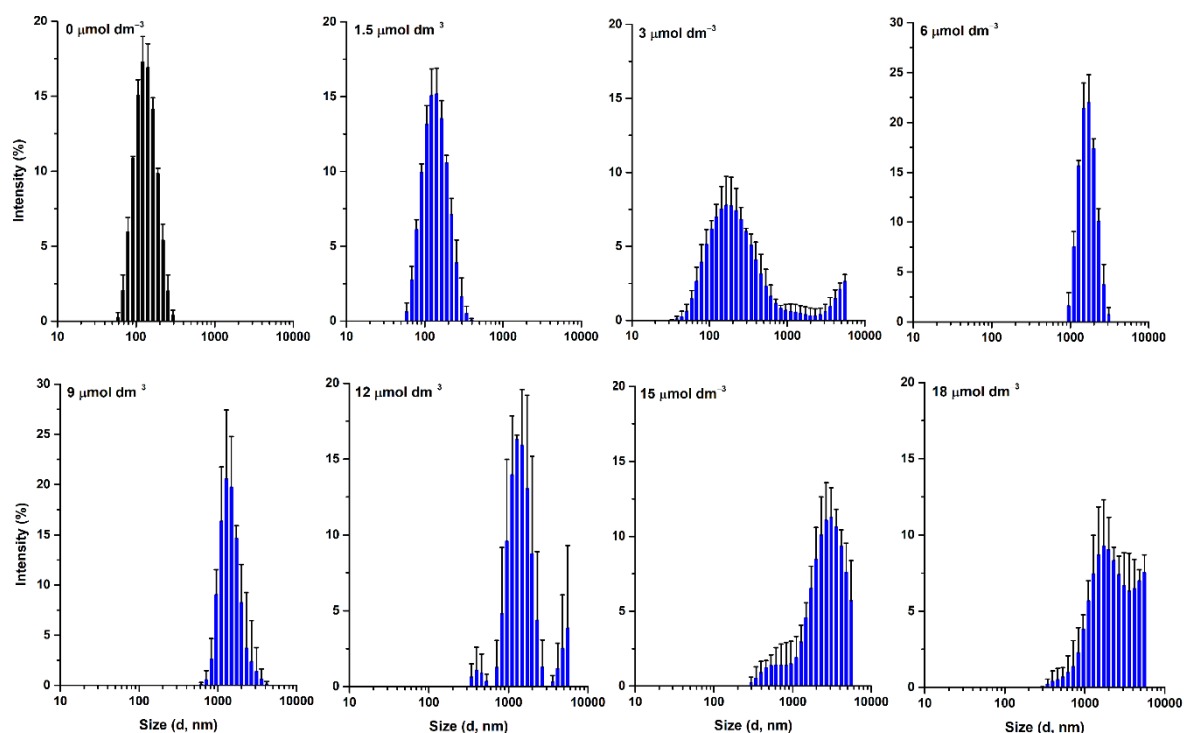

**Figure S3.** Intensity-weighted size distribution of POPE:POPG (1:1) LUVs in the presence of W-BP100 obtained by DLS. Intensity-weighted size distribution of  $100 \mu\text{mol dm}^{-3}$  POPE:POPG (1:1) LUVs in the absence (black) and presence (blue) of increasing W-BP100 concentrations, at  $25.0 \pm 0.1^\circ\text{C}$ .  $d$  stands for vesicle diameter. Data are the mean  $\pm$  SD of three replicate measurements (one single experiment).

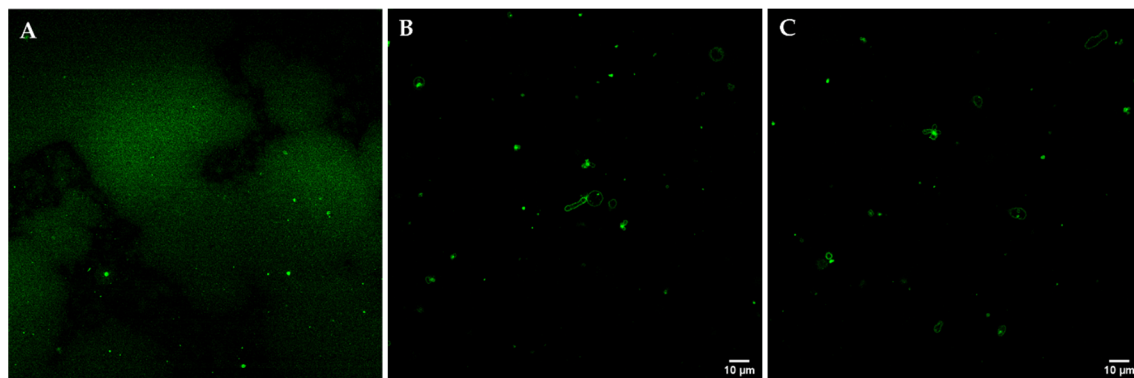

**Figure S4.** Confocal microscopy imaging of POPC:POPG (1:1) GUVs incubated with W-BP100 ( $P/L = 1.2$ ). 2% NBD-labeled GUVs ( $\sim 48 \mu\text{mol dm}^{-3}$ ) were incubated with W-BP100 for 10 min and images were acquired under a  $63\times$ -oil objective, over 10 min, with 10 s interval between frames. (A) Adhesion of NBD FLLs to the bottom of the petri dish due to GUV destruction. (B) Formation of elongated vesicles with tubular-like morphology. (C) Formation of large aggregates constituted by small lipid-like vesicles. Magnification:  $630\times$ . Scale bar:  $10 \mu\text{m}$ .

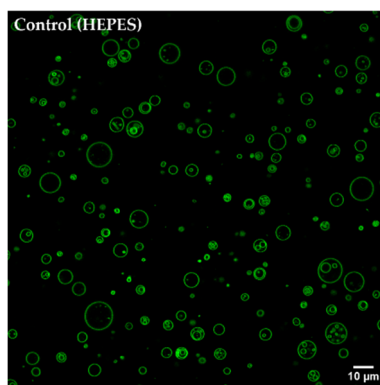

**Figure S5.** Confocal microscopy imaging of POPC:POPG (1:1) GUVs incubated with HEPES buffer. An equal volume of HEPES buffer, the solvent of the peptide stock solution, was added to the 40  $\mu\text{L}$  drop of GUVs used for image analysis (control). The volume added (11  $\mu\text{L}$ ) corresponded to the total volume of peptide added to obtain the final P/L ratio tested (P/L = 2.5). Magnification: 630 $\times$ . Scale bar: 10  $\mu\text{m}$ .

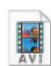

Video S1.avi

**Video S1.** Confocal microscopy imaging of POPC:POPG (1:1) GUVs incubated with W-BP100 (P/L = 0.8). 2% NBD-labeled GUVs ( $\sim 48 \mu\text{mol dm}^{-3}$ ) were incubated with W-BP100 for 10 min and images were acquired under a 63 $\times$ -oil objective, over 10 min, with 10 s interval between frames. Magnification: 630 $\times$ . Scale bar: 10  $\mu\text{m}$ .

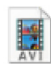

Video S2.avi

**Video S2:** Confocal microscopy imaging of POPC:POPG (1:1) GUVs incubated with W-BP100 (P/L = 1.7). 2% NBD-labeled GUVs ( $\sim 48 \mu\text{mol dm}^{-3}$ ) were incubated with W-BP100 for 10 min and images were acquired under a 63 $\times$ -oil objective, over 10 min, with 10 s interval between frames. Magnification: 630 $\times$ . Scale bar: 10  $\mu\text{m}$ .

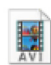

Video S3.avi

**Video S3:** Confocal microscopy imaging of POPC:POPG (1:1) GUVs incubated with W-BP100 (P/L = 2.5). 2% NBD-labeled GUVs ( $\sim 48 \mu\text{mol dm}^{-3}$ ) were incubated with W-BP100 for 10 min and images were acquired under a 63 $\times$ -oil objective, over 10 min, with 10 s interval between frames. Magnification: 630 $\times$ . Scale bar: 10  $\mu\text{m}$ .
